# Supplementary material
Source: PubMed Central journal article supplement (PMC7108904)
Supplement: jci-130-125771-s359.pdf [file jci-130-125771-s359.pdf]

# Supplemental Information

## Profilin1 delivery tunes cytoskeleton dynamics towards CNS axon regeneration

Rita Pinto-Costa,<sup>1,3</sup> Sara C. Sousa,<sup>1,3</sup> Sérgio C. Leite,<sup>1</sup> Joana Nogueira-Rodrigues,<sup>1,3</sup> Tiago Ferreira da Silva,<sup>2</sup> Diana Machado,<sup>1</sup> Joana Marques,<sup>1</sup> Ana Catarina Costa,<sup>1</sup> Márcia A. Liz,<sup>1</sup> Francesca Bartolini,<sup>4</sup> Pedro Brites,<sup>2</sup> Mercedes Costell,<sup>5</sup> Reinhard Fässler,<sup>6</sup> and Mónica M. Sousa<sup>1</sup>

<sup>1</sup>Nerve Regeneration Group and <sup>2</sup>NeuroLipid Biology Group, Program in Neurobiology and Neurologic Disorders, Instituto de Biologia Molecular e Celular – IBMC and Instituto de Inovação e Investigação em Saúde, Universidade do Porto, 4200-135 Porto, Portugal.

<sup>3</sup>Graduate Program in Molecular and Cell Biology, Instituto de Ciências Biomédicas Abel Salazar- ICBAS, University of Porto, 4050-313 Porto, Portugal.

<sup>4</sup>Department of Pathology and Cell Biology, Columbia University, New York, NY 10032, USA.

<sup>5</sup>Department of Biochemistry and Molecular Biology and Estructura de Reserca Interdisciplinar en Biotecnologia i Biomedicina, Universitat de València, 46100 Burjassot, Spain.

<sup>6</sup>Max Plank Institute of Biochemistry, Department of Molecular Medicine, Max Plank Institute of Biochemistry, 82152 Martinsried, Germany.

# 1 Supplemental Figures and Legends

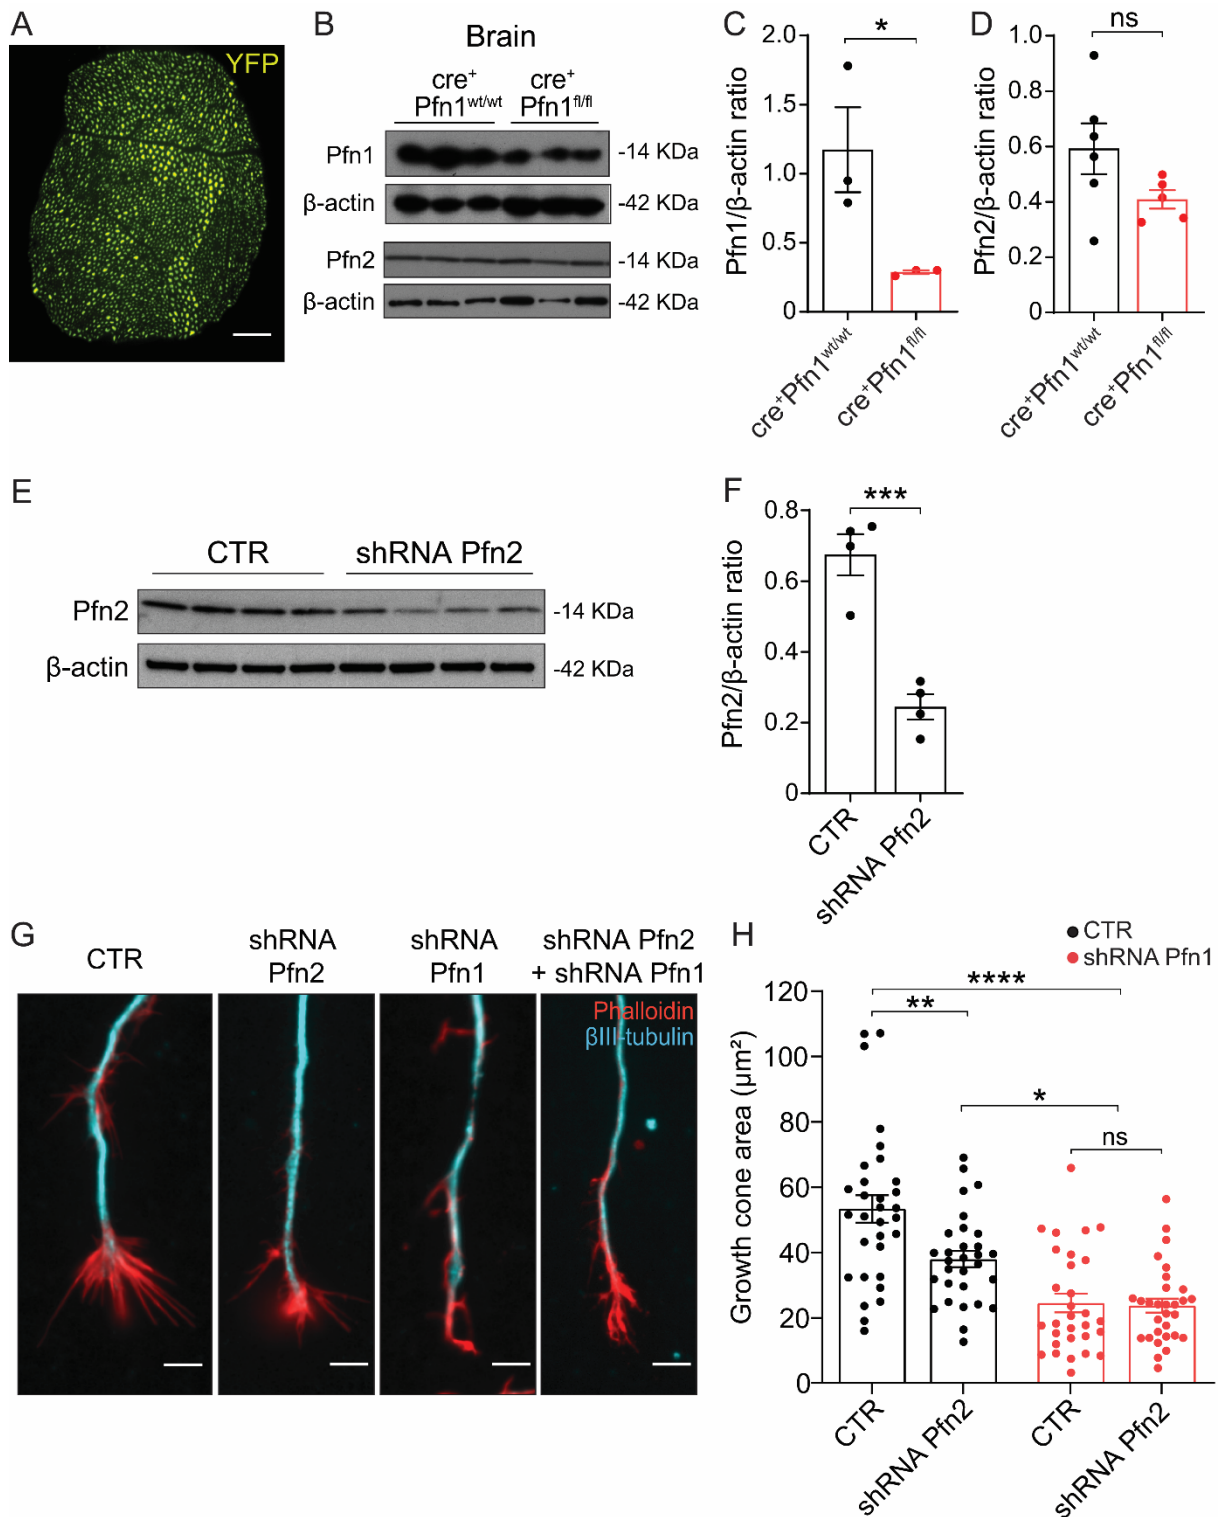

**Supplemental Figure 1. Analysis of cre<sup>+</sup>Pfn1<sup>wt/wt</sup> and cre<sup>+</sup>Pfn1<sup>fl/fl</sup> mice.** (A) Representative image of a sciatic nerve cross section collected from a cre<sup>+</sup>Pfn1<sup>wt/wt</sup> mouse expressing YFP in myelinated axons. Scale bar: 50 μm. (B) Western blot and respective quantification by densitometry showing (C) Pfn1 and (D) Pfn2 levels in brains of cre<sup>+</sup>Pfn1<sup>wt/wt</sup> and cre<sup>+</sup>Pfn1<sup>fl/fl</sup> mice. β-actin signal was used as a loading control. Data represent mean ± SEM (\*P < 0.05, ns: not significant, t-test, n = 5-6 animals/condition). (E) Western blot analysis of Pfn2 knockdown in CAD cells 48 hr after transfection with a plasmid expressing shRNA Pfn2. (F) Quantification of Pfn2/β-actin ratio in CAD cells. (G) Fluorescence microscopy images of growth cones in CTR, shRNA Pfn2, shRNA Pfn1, and shRNA Pfn2 + shRNA Pfn1 conditions. (H) Quantification of growth cone area (μm<sup>2</sup>) in CTR and shRNA Pfn2 conditions.

1 actin signal was used as a loading control. **(F)** Quantification of (E). Data represent mean  $\pm$   
2 SEM (\*\*P < 0.001, t-test). **(G)**  $\beta$ III-tubulin (cyan) and actin (red) in growth cones of  
3 hippocampal neurons co-nucleofected with a GFP and either/both Pfn1 shRNA and Pfn2  
4 shRNA expressing plasmids. Scale bar: 4  $\mu$ m. **(H)** Quantification of growth cone area related  
5 to (G). Only GFP<sup>+</sup> neurons were chosen for quantification. Data represent mean  $\pm$  SEM (\*P <  
6 0.05, \*\*P < 0.01, \*\*\*\*P < 0.0001, ns: not significant, one-way ANOVA Tukey's posttest, *n* =  
7 30-31 neurons/condition).

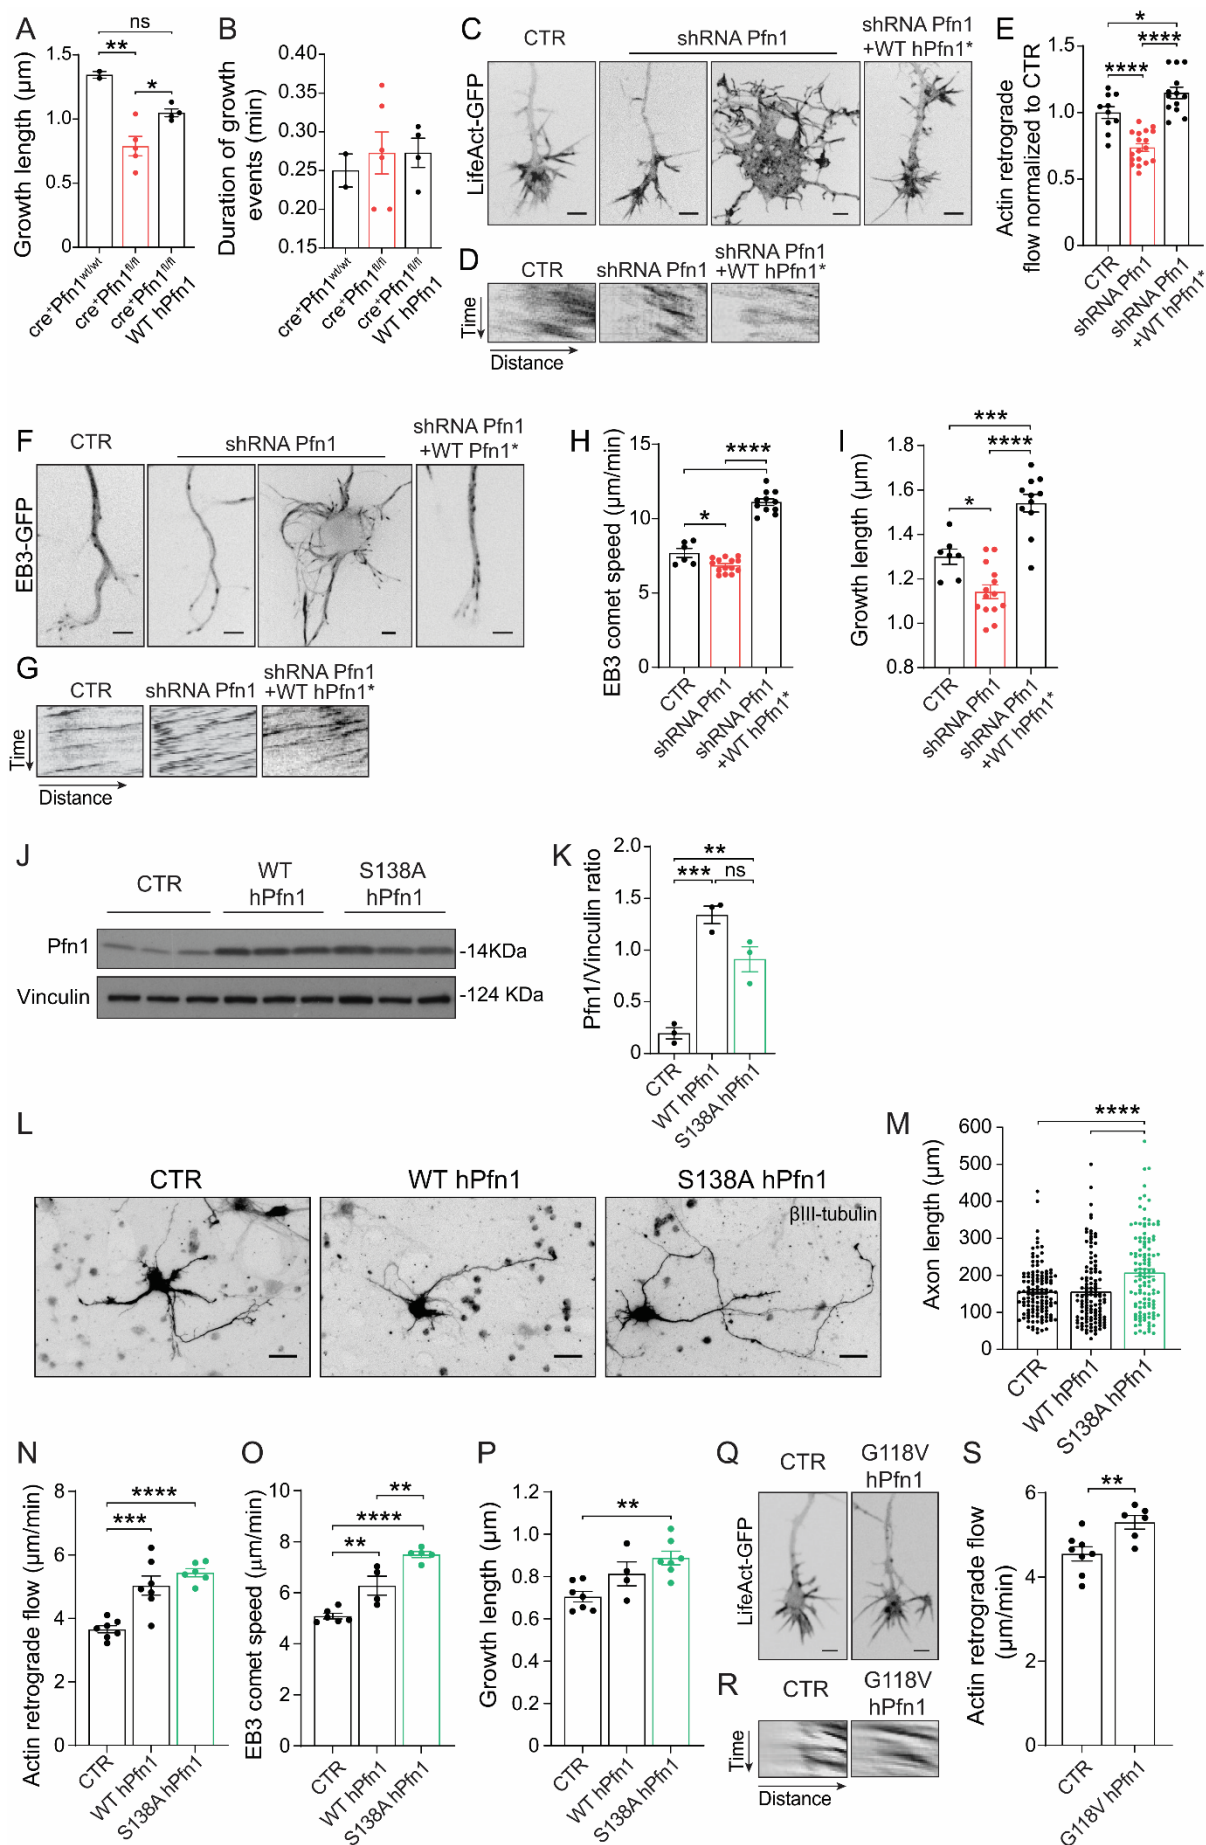

**Supplemental Figure 2. Pfn1 levels regulate actin and MT dynamics.** (A) Quantification of growth length and (B) duration in cre<sup>+</sup>Pfn1 DRG neurons. Data represent mean  $\pm$  SEM (\*P < 0.05, \*\*P < 0.01, ns: not significant, one-way ANOVA Tukey's posttest,  $n = 2-6$  growth cones/condition). (C) LifeAct-GFP imaging in hippocampal neurons expressing empty (CTR) or shRNA Pfn1 plasmids. Middle panels (shRNA Pfn1) show representative stage 3 (left) and stage 1 (right) growth cones; Scale bar: 4  $\mu$ m. (D) Kymographs and (E) actin flow quantification related to (C). (F) EB3-GFP imaging related to (C). Scale bar: 3  $\mu$ m. (G) Kymographs and (H) quantification of EB3 comet speed and (I) growth length, related to (F). Data in (E), (H) and (I) represent mean  $\pm$  SEM (\*P < 0.05, \*\*\*P < 0.001, \*\*\*\*P < 0.0001, one-way ANOVA Tukey's posttest,  $n = 6-18$  growth cones/condition). (J) Western blot and (K) densitometry of CAD cells expressing WT or S138A hPfn1. Vinculin was used as control. Data represent mean  $\pm$  SEM (\*\*P < 0.01, \*\*\*P < 0.001, ns: not significant, one-way ANOVA Tukey's posttest). (L)  $\beta$ III-tubulin staining of WT and S138A hPfn1 expressing hippocampal neurons. Scale bar: 30  $\mu$ m. (M) Quantification of axon length related to (L). Data represent mean  $\pm$  SEM (\*\*\*\*P < 0.0001, one-way ANOVA Tukey's posttest,  $n = 117-126$  neurons/condition). (N) Quantification of actin retrograde flow, (O) EB3 comet speed and (P) growth length related to (L). Data represent mean  $\pm$  SEM (\*\*P < 0.01, \*\*\*P < 0.001, \*\*\*\*P < 0.0001, one-way ANOVA Tukey's posttest,  $n = 4-7$  growth cones/condition). (Q) LifeAct-GFP imaging in hippocampal neurons expressing empty (CTR) or G118V hPfn1 plasmids. (R) Kymographs and (S) actin flow quantification related to (Q). Data represent mean  $\pm$  SEM (\*\*P < 0.01, t-test,  $n = 6-8$  growth cones/condition).

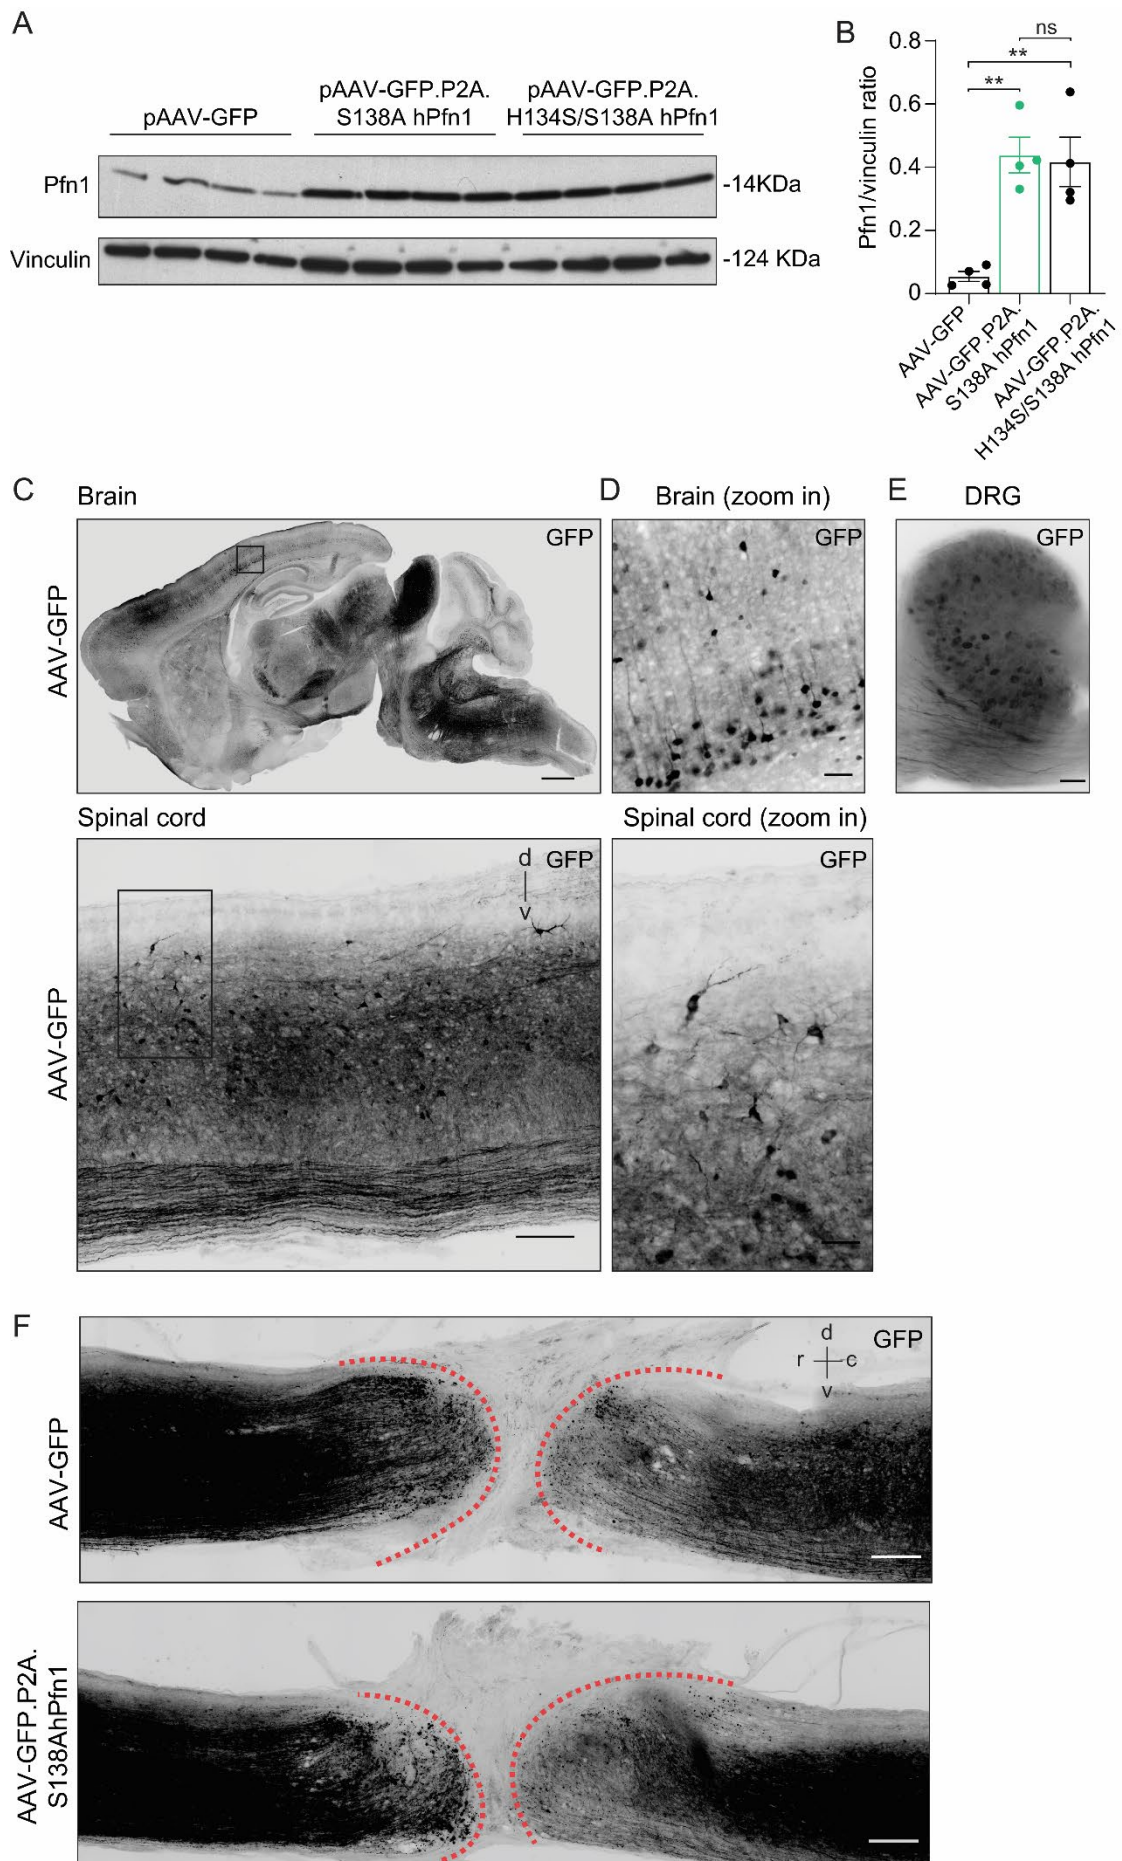

1 **Supplemental Figure 3. Validation of pAAV.GFP.P2A.S138A hPfn1 and**  
2 **pAAV.GFP.P2A.H134S/S138A hPfn1 expression in vitro, and in vivo after systemic**  
3 **viral delivery. (A)** Western blot analysis of Pfn1 expression in CAD 48 hr after transfection  
4 with either pAAV-GFP, pAAV-GFP.P2A.S138A hPfn1 or pAAV-GFP.P2A.H134S/S138A  
5 hPfn1 plasmids. **(B)** Quantification of (A). Data represent mean  $\pm$  SEM (\*\*P < 0.01, ns: not  
6 significant, one-way ANOVA Tukey's posttest). **(C)** GFP expression in brain and spinal cord,  
7 2 weeks after systemic delivery of AAV-PHP.eB viral particles. Scale bars -brain: 800  $\mu$ m; -  
8 spinal cord: 200  $\mu$ m; d:dorsal, v:ventral. **(D)** Zoom-ins of (C). Scale bar: 50  $\mu$ m. **(E)** GFP  
9 expression in DRG, 2 weeks after systemic delivery of AAV-PHP.eB viral particles. Scale  
10 bar: 100  $\mu$ m. **(F)** Low-magnification images of injured spinal cords shown in Figure 6K. Scale  
11 bar: 300  $\mu$ m.
